# Supplementary material for: Biomedical HIV prevention cascades and acceptability of community health worker-led services: a cross-sectional survey in Lesotho
Source: Research Square preprint supplement (doi:10.21203/rs.3.rs-8220761/v1), 2026-02-19
Supplement: Supplementary file 1 [file c4349c51e06168d9e2251b60.docx]

**Supplementary Table S1: Survey items used in the HIV prevention cascade and CHW acceptability analysis**

| **Questions** | **Choice labels** |
| --- | --- |
| **Section 1: Demographic information** | |
| What is your name? | Free text |
| What is your sex? | Male/Female/Prefer to self describe |
| What is your date of birth? | DD.MM.YYY |
| How do you describe your marital status ? | Not married or cohabiting/Married or cohabiting/Unknown/Refused |
| What is the highest level of education you have obtained? | <12 years of education/>12 years of education/Unknown/Refused |
| What is your current occupation? | Unemployed/self employed/Unknown/Refused |
| **Section 2: HIV assessment** | |
| What is your current HIV status? | Known HIV Positive/Documented HIV negative in the last 12 months/Documented HIV negative older than 12 months/Unknown/Refused |
| When was your last HIV test ? | Within the last: 1-3 months/ 3-6 months/ 6-12 months/Unknown/Refused |
| Have you had unprotected sex in the last 6 months with one or more partner/s with an unknown HIV status? | Yes/No/Unknown/Refused |
| **Sectoion 3: HIV counselling & testing** | |
| How comfortable would you feel receiving HIV counselling (for free) from a CCW supported by a tablet in the community? | Comfortable/Not comfortable/Unknown/Refused |
| Would you be comfortable receiving a test kit for oral HIV self-testing (for free) from a CCW supported by a tablet in the community? | Comfortable/Not comfortable/Unknown/Refused |
| Would you be comfortable receiving a finger-prick HIV blood test (for free) from a CCW supported by a tablet in the community? | Comfortable/Not comfortable/Unknown/Refused |
| Do you think the community would benefit from CCW-delivered HIV counselling and testing services? | Yes/No/Unknown/Refused |
| **Section 4: HIV Pre-Exposure Prophylaxis** | |
| Oral PrEP awareness and experience |  |
| Have you ever heard of oral PrEP? | Yes/No/Unknown/Refused |
| Has oral PrEP ever been offered to you? | Yes/No/Unknown/Refused |
| Have you ever taken oral PrEP? | Yes/No/Unknown/Refused |
| Are you currently taking oral PrEP? | Yes/No/Unknown/Refused |
| Are you generally interested in receiving oral PrEP (e.g. by nurses in health facilities)? | Yes/No/Unknown/Refused |
| Do you think the community would benefit from CCW-delivered oral PrEP? | Yes/No/Unknown/Refused |
| How comfortable would you feel recieving oral PrEP (for free) from a CCW supported by a tablet in the community? | Comfortable/Not comfortable/Unknown/Refused |
| **Section 5: HIV Post Exposure Prophylaxis** | |
| Have you ever heard of PEP? | Yes/No/Unknown/Refused |
| Have you ever taken PEP? | Yes/No/Unknown/Refused |
| If you were exposed to HIV in the future, would you consider taking PEP? | Yes/No/Unknown/Refused |
| Do you think the community would benefit from CCW-delivered PEP? | Yes/No/Unknown/Refused |
| How comfortable would you feel receiving PEP (for free) from a CCW supported by a tablet in the community? | Comfortable/Not comfortable/Unknown/Refused |
| **Section 6: Male/Female condoms** | |
| How comfortable would you feel receiving male/external condoms (for free) from a CCW supported by a tablet in the community? | Comfortable/Not comfortable/Unknown/Refused |
| How comfortable would you feel receiving female/internal condoms (for free) from a CCW supported by a tablet in the community? | Comfortable/Not comfortable/Unknown/Refused |
| **Section 7: The Dual Prevention Pill** | |
| How comfortable would you feel receiving DPP from a CCW supported by a tablet in the community? | Comfortable/Not comfortable/Unknown/Refused |
| Do you think the community would benefit from CCW-delivered DPP? | Yes/No/Unknown/Refused |
